# Supplementary material
Source: Frontiers journal article supplement (https://www.frontiersin.org/articles/214742)

**Supplementary Figure 1.** Exemplary day curves on one day for berry temperature of exposed east cluster (Eclust), west cluster (Wclust) and average of air temperature (Avg\_T<sub>air</sub>). Red line corresponds to berry temperature threshold above which anthocyanin accumulation is compromised.

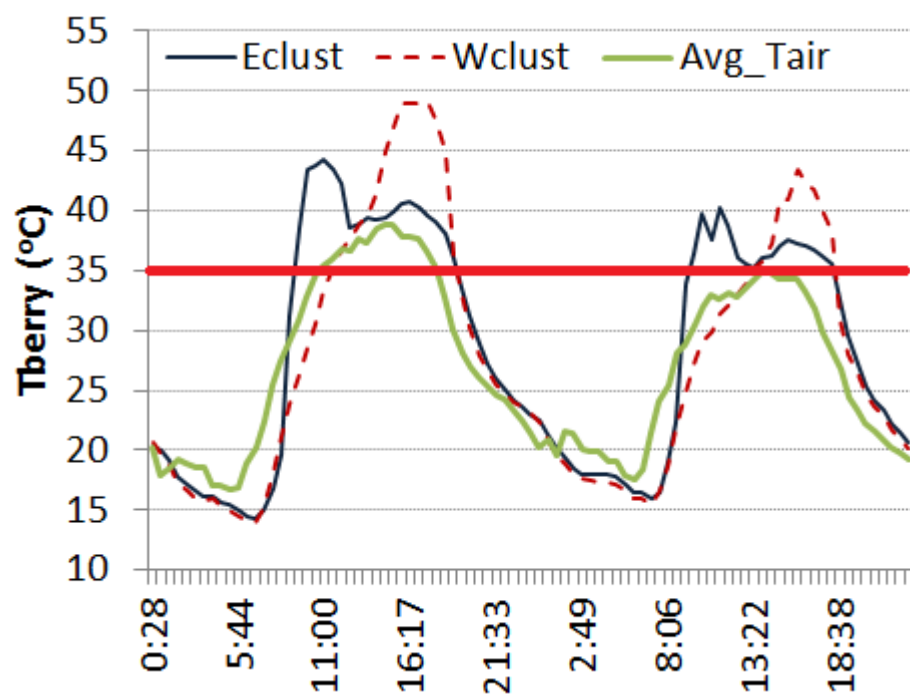

Supplement: Image_1.PDF [file Image_1.PDF]
