# Supplementary material
Source: Frontiers journal article supplement (https://www.frontiersin.org/articles/214742)
Supplement: Image_2.PDF [file Image_2.PDF]

**Supplementary Figure 2.** Principal components analysis performed on cumulative water stress ( $S\Psi_{pd}$ ), NHH and AEBT\* at *véraison* from 2013 (A) and 2014 (B) growing seasons for Tempranillo cv. (A) PC1=76%; PC2=16% (B) PC1=49%; PC2=35%

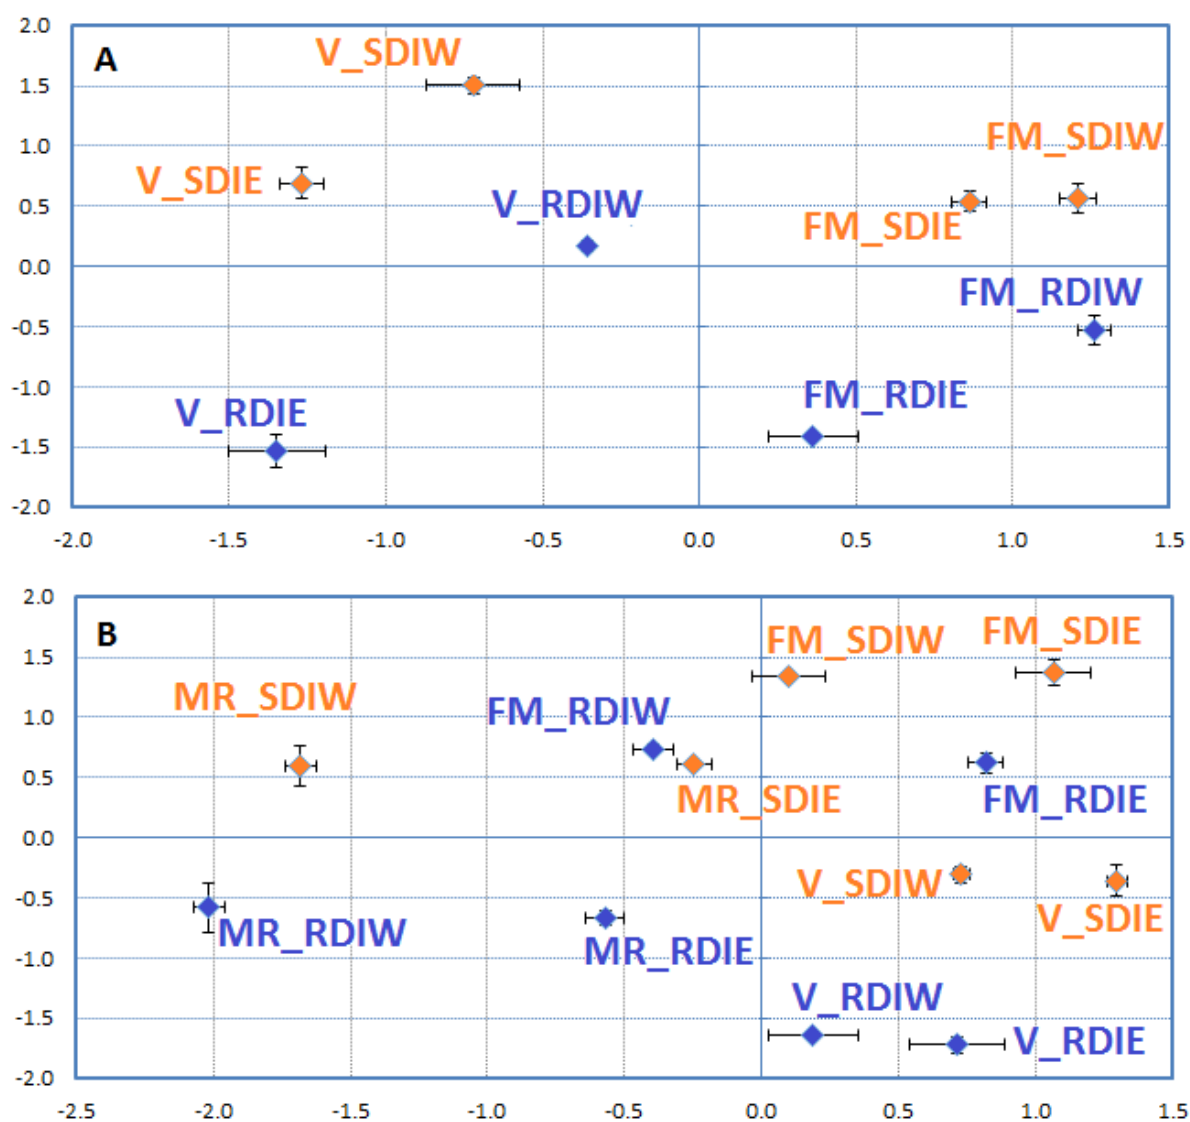

\* AEBT- Accumulated Exceeding Berry Temperature was determined as follow:

$$AEBT = \begin{cases} 0, & \text{if } Tb \leq 35^{\circ}C \\ Tb - 35, & \text{if } Tb > 35^{\circ}C \end{cases}$$
